# Supplementary material for: Identifying decadal trends in deweathered concentrations of criteria air pollutants in Canadian urban atmospheres with machine learning approaches
Source: Copernicus journal article supplement (doi:10.5194/acp-24-7773-2024), 2024-07-09

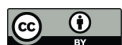

*Supplement of*

## **Identifying decadal trends in deweathered concentrations of criteria air pollutants in Canadian urban atmospheres with machine learning approaches**

**Xiaohong Yao and Leiming Zhang**

*Correspondence to:* Xiaohong Yao (xhyao@ouc.edu.cn) and Leiming Zhang (leiming.zhang@ec.gc.ca)

The copyright of individual parts of the supplement might differ from the article licence.

Table S1a. Sampling sites and periods for NO<sub>2</sub> at ten Canadian cities (hourly averages in ppb were available).

| City        | Period    | Site ID | Latitude | Longitude | Note                                                                                        |
|-------------|-----------|---------|----------|-----------|---------------------------------------------------------------------------------------------|
| Halifax     | 1996-2017 | 30118   | 44.646   | -63.573   |                                                                                             |
| Montreal    | 1995-2019 | 50103   | 45.641   | -73.500   |                                                                                             |
| Quebec city | 1996-2019 | 50308   | 46.821   | -71.220   | Data collected at 50307 (Lat. 46.824, Long. - 71.235) in 1996-1997 were used for data loss. |
| Toronto     | 2003-2019 | 60430   | 43.709   | -79.544   |                                                                                             |
| Hamilton    | 1996-2019 | 60512   | 43.258   | -79.862   |                                                                                             |
| Winnipeg    | 1984-2018 | 70119   | 49.898   | -97.147   |                                                                                             |
| Edmonton    | 1994-2019 | 90130   | 53.545   | -113.499  |                                                                                             |
| Calgary     | 1986-2007 | 90227   | 51.048   | -114.076  |                                                                                             |
| Vancouver   | 1986-2019 | 100111  | 49.281   | -122.849  |                                                                                             |
| Victoria    | 1993-2019 | 100304  | 48.442   | -123.363  |                                                                                             |

Table S1b. Sampling sites and periods for CO at ten Canadian cities (hourly averages in ppb were available).

| City        | Period    | Site ID | Latitude | Longitude | Note                                                                                                           |
|-------------|-----------|---------|----------|-----------|----------------------------------------------------------------------------------------------------------------|
| Halifax     | 1983-2019 | 30118   | 44.646   | -63.573   | Date collected at other three sites within 300 m were used in 1983-1985, 1986-1990 and 2017-2019 for data loss |
| Montreal    | 1995-2010 | 50103   | 45.641   | -73.500   |                                                                                                                |
| Quebec city | 1996-2019 | 50308   | 46.821   | -71.220   | Data collected at 50307 (Lat. 46.824, Long. - 71.235) in 1996-1997 were used for data loss.                    |
| Toronto     | 2003-2019 | 60430   | 43.709   | -79.544   |                                                                                                                |
| Hamilton    | 2000-2019 | 60512   | 43.258   | -79.862   |                                                                                                                |
| Winnipeg    | 1982-2018 | 70119   | 49.898   | -97.147   |                                                                                                                |
| Edmonton    | 1981-2019 | 90130   | 53.545   | -113.499  |                                                                                                                |
| Calgary     | 1981-2015 | 90227   | 51.048   | -114.076  | Data collected at 90228 (Lat. 51.047, Long. - 114.076) in 2009-2015 were used for data loss.                   |
| Vancouver   | 1981-2019 | 100111  | 49.281   | -122.849  |                                                                                                                |
| Victoria    | 1998-2019 | 100304  | 48.442   | -123.363  |                                                                                                                |

Table S1c. Sampling sites and periods for SO<sub>2</sub> at ten Canadian cities (hourly averages in ppb were available).

| City        | Period    | Site ID | Latitude | Longitude | Note                                                                                           |
|-------------|-----------|---------|----------|-----------|------------------------------------------------------------------------------------------------|
| Halifax     | 1982-2019 | 30118   | 44.646   | -63.573   | Data collected other two sites within 100 m were used in 1982-1999 and 2019 for the data loss. |
| Montreal    | 1995-2010 | 50103   | 45.641   | -73.500   |                                                                                                |
| Quebec city | 1996-2019 | 50308   | 46.821   | -71.220   | Data collected at 50307 (Lat. 46.824, Long. -71.235) in 1996-1997 were used for data loss.     |
| Toronto     | 2003-2019 | 60430   | 43.709   | -79.544   |                                                                                                |
| Hamilton    | 1996-2019 | 60512   | 43.258   | -79.862   |                                                                                                |
| Winnipeg    | 1987-2018 | 70119   | 49.898   | -97.147   |                                                                                                |
| Edmonton    | 1987-2019 | 90121   | 53.545   | -113.499  |                                                                                                |
| Calgary     | 1983-2010 | 90218   | 51.009   | -114.025  |                                                                                                |
| Vancouver   | 1981-2019 | 100111  | 49.281   | -122.849  |                                                                                                |
| Victoria    | 1998-2019 | 100304  | 48.442   | -123.363  |                                                                                                |

Table S1d. Sampling sites and periods for O<sub>3</sub> at ten Canadian cities (hourly averages in ppb were available).

| City        | Period    | Site ID | Latitude | Longitude | Note                                                                                       |
|-------------|-----------|---------|----------|-----------|--------------------------------------------------------------------------------------------|
| Halifax     | 2000-2017 | 30118   | 44.646   | -63.573   |                                                                                            |
| Montreal    | 1995-2019 | 50103   | 45.641   | -73.500   |                                                                                            |
| Quebec city | 1995-2019 | 50308   | 46.821   | -71.220   | Data collected at 50307 (Lat. 46.824, Long. -71.235) in 1995-1997 were used for data loss. |
| Toronto     | 2003-2019 | 60430   | 43.709   | -79.544   |                                                                                            |
| Hamilton    | 1987-2019 | 60512   | 43.258   | -79.862   |                                                                                            |
| Winnipeg    | 1982-2018 | 70119   | 49.898   | -97.147   |                                                                                            |
| Edmonton    | 1981-2019 | 90130   | 53.545   | -113.499  |                                                                                            |
| Calgary     | 1982-2015 | 90227   | 51.048   | -114.076  | Data collected at 90228 (Lat. 51.047, Long. -114.076) were used in 2009-2015 for data loss |
| Vancouver   | 1981-2019 | 100111  | 49.281   | -122.849  |                                                                                            |
| Victoria    | 1998-2019 | 100304  | 48.442   | -123.363  |                                                                                            |

Table S1e. Sampling sites and periods for PM<sub>2.5</sub> at ten Canadian cities (hourly averages in  $\mu\text{g m}^{-3}$  were available).

| City        | Period    | Site ID | Latitude | Longitude | Note                                                                                    |
|-------------|-----------|---------|----------|-----------|-----------------------------------------------------------------------------------------|
| Halifax     | 2006-2019 | 30113   | 44.647   | -63.574   |                                                                                         |
| Montreal    | 2004-2019 | 50103   | 45.641   | -73.500   |                                                                                         |
| Quebec city | 1998-2019 | 50308   | 46.821   | -71.221   |                                                                                         |
| Toronto     | 2000-2019 | 60430   | 43.709   | -79.544   |                                                                                         |
| Hamilton    | 1998-2019 | 60512   | 43.258   | -79.862   |                                                                                         |
| Winnipeg    | 1995-2018 | 70119   | 49.898   | -97.147   |                                                                                         |
|             |           |         |          |           |                                                                                         |
| Edmonton    | 1998-2019 | 90130   | 53.545   | -113.499  |                                                                                         |
| Calgary     | 1998-2014 | 90227   | 51.048   | -114.076  | Data collected at 90228 (Lat. 51.047, Long. -114.076) in 2009-2014 were used after 2009 |
| Vancouver   | 2003-2019 | 100111  | 49.281   | -122.849  |                                                                                         |
| Victoria    | 1998-2019 | 100304  | 48.444   | -123.363  |                                                                                         |

Table S2a. SO<sub>2</sub> emissions from registered facilities in ten Canadian cities (tons year<sup>-1</sup>). Blank cells represent no data available.

| Year | Halifax | Montreal | Quebec City | Toronto | Hamilton | Winnipeg | Edmonton | Calgary | Vancouver | Victoria |
|------|---------|----------|-------------|---------|----------|----------|----------|---------|-----------|----------|
| 2002 | 638     | 3628     |             | 273     | 8073     | 0        | 1908     | 0       | 0         | 217      |
| 2003 | 741     | 4197     |             | 269     | 8134     | 0        | 1788     | 0       | 0         | 212      |
| 2004 | 705     | 3313     |             | 272     | 8435     | 0        | 2195     | 0       | 0         | 273      |
| 2005 | 41      | 3649     |             | 283     | 12864    | 0        | 1445     | 6       | 0         | 269      |
| 2006 | 35      | 2786     |             | 171     | 8306     | 0        | 1531     | 6       | 2         | 261      |
| 2007 | 555     | 3008     |             | 152     | 7649     | 0        | 1373     | 6       | 0         |          |
| 2008 | 568     | 2660     |             | 105     | 8586     |          | 3995     | 6       | 2         | 265      |
| 2009 | 328     | 3113     |             | 25      | 7284     | 2        | 5176     | 14      | 0         | 215      |
| 2010 | 271     | 2540     | 163         | 29      | 11803    | 3        | 3733     | 6       | 86        | 8        |
| 2011 | 302     | 2490     | 661         | 1       | 12776    |          | 4276     | 1       | 119       | 11       |
| 2012 | 277     | 1188     | 631         | 0       | 13310    |          | 3463     | 0       | 164       | 2        |
| 2013 | 260     | 1175     | 361         | 1       | 11558    |          | 4558     | 0       | 158       | 3        |
| 2014 | 185     | 1148     | 643         | 0       | 10977    |          | 3728     | 0       | 104       | 7        |
| 2015 | 63      | 1148     | 959         | 0       | 11436    |          | 3538     | 1       | 119       | 11       |
| 2016 | 10      | 2675     | 982         | 0       | 10072    |          | 3814     | 1       | 118       |          |
| 2017 | 4       | 3404     | 977         | 1       | 8934     |          | 4014     | 1       | 124       |          |
| 2018 | 0       | 3183     | 1024        | 0       | 12154    |          | 3101     | 0       | 96        |          |
| 2019 | 0       | 3338     | 847         | 0       | 2507     |          | 3534     | 0       | 119       |          |

Table S2b. NO<sub>x</sub> emissions from registered facilities in ten Canadian cities (tons year<sup>-1</sup>). Blank cells represent no data available.

| Year | Halifax | Montreal | Quebec City | Toronto | Hamilton | Winnipeg | Edmonton | Calgary | Vancouver | Victoria |
|------|---------|----------|-------------|---------|----------|----------|----------|---------|-----------|----------|
| 2002 | 102     | 1791     | 0           | 1142    | 6306     | 3        | 3329     | 68      | 178       |          |
| 2003 | 85      | 1876     | 1           | 1051    | 6279     | 1        | 3285     | 166     | 208       | 113      |
| 2004 | 77      | 1751     | 25          | 1253    | 6086     | 23       | 3111     | 229     | 297       | 117      |
| 2005 | 14      | 1666     | 21          | 1119    | 7059     | 22       | 3258     | 171     | 318       | 84       |
| 2006 | 12      | 1388     | 21          | 960     | 5961     | 21       | 4732     | 271     | 267       | 81       |
| 2007 | 192     | 1669     | 22          | 791     | 5890     | 60       | 4444     | 262     | 278       | 29       |
| 2008 | 201     | 1386     |             | 644     | 5732     | 70       | 4274     | 192     | 253       | 94       |
| 2009 | 98      | 1464     |             | 322     | 4248     | 34       | 3832     | 131     | 188       | 60       |
| 2010 | 81      | 1369     | 44          | 267     | 6394     | 42       | 3849     | 108     | 593       | 20       |
| 2011 | 113     | 1408     | 202         | 186     | 5843     | 26       | 3205     | 184     | 602       | 22       |
| 2012 | 109     | 1402     | 202         | 179     | 5971     | 24       | 3497     | 152     | 665       | 17       |
| 2013 | 80      | 1430     | 100         | 162     | 5792     | 22       | 2822     | 197     | 650       | 19       |
| 2014 | 45      | 1252     | 167         | 232     | 5448     | 18       | 2448     | 150     | 587       | 20       |
| 2015 | 21      | 1315     | 856         | 227     | 4942     | 10       | 2631     | 218     | 268       | 21       |
| 2016 | 18      | 1327     | 866         | 191     | 4800     | 14       | 2467     | 202     | 447       | 19       |
| 2017 | 7       | 1397     | 860         | 184     | 4867     | 13       | 2624     | 295     | 573       | 19       |
| 2018 | 6       | 1406     | 902         | 177     | 5254     | 13       | 3109     | 352     | 533       | 15       |
| 2019 | 6       | 1598     | 753         | 178     | 1410     | 33       | 2719     | 391     | 278       |          |

Table S3. Regression of (BRTs and RF) deweathered against original annual average CO mixing ratios, annual decreasing rate (ppm year<sup>-1</sup>) and overall decreasing percentage (%) of deweathered and original CO mixing ratios (decreasing trends were always obtained with P<0.05 except in Montreal), correlation (R<sup>2</sup>) of deweathered and original CO mixing ratios against provincial total CO emissions and transportation CO emissions (P<0.05), and percentage decreases (%) of the provincial total CO emissions and transportation CO emissions (#P>0.05; ##since 1990; and R<sup>2</sup>>0.8 was highlighted in purple).

| City                    | Regression of deweathered against original mixing ratio (P<0.01) |              | Annual decreasing rate (ppm year <sup>-1</sup> ) and overall decreasing percentage (%) (P<0.05) |              |              | Correlation (R <sup>2</sup> ) of mixing ratios against provincial total and transportation CO emissions (P<0.05) |               |               | Percentage decreases (%) of provincial total and transportation emissions |
|-------------------------|------------------------------------------------------------------|--------------|-------------------------------------------------------------------------------------------------|--------------|--------------|------------------------------------------------------------------------------------------------------------------|---------------|---------------|---------------------------------------------------------------------------|
|                         | BRTs                                                             | RF           | BRTs                                                                                            | RF           | original     | BRTs                                                                                                             | RF            | original      |                                                                           |
| Halifax (1984-2019)     | y=1.01×<br>x                                                     | y=1.07<br>×x | 0.029,<br>90                                                                                    | 0.030,<br>90 | 0.029,<br>92 | 0.83,<br>0.81                                                                                                    | 0.86,<br>0.83 | 0.77,<br>0.75 | 58, 63##                                                                  |
| Montreal (1995-2010)    | y=1.03×<br>x                                                     | y=1.03<br>×x | /#                                                                                              | /#           | /#           | /#                                                                                                               | /#            | /#            | 37, 53                                                                    |
| Quebec city (1996-2019) | y=1.07×<br>x                                                     | y=1.12<br>×x | 0.013,<br>56                                                                                    | 0.014,<br>56 | 0.010,<br>58 | 0.94,<br>0.93                                                                                                    | 0.93,<br>0.93 | 0.83,<br>83   | 42, 60                                                                    |
| Toronto (2000-2019)     | y=0.92×<br>x                                                     | y=0.99<br>×x | 0.041,<br>84                                                                                    | 0.046,<br>83 | 0.048,<br>86 | 0.71,<br>69                                                                                                      | 0.71,<br>0.69 | 0.70,<br>0.68 | 59, 62                                                                    |
| Hamilton (2000-2019)    | y=1.03×<br>x                                                     | y=1.03<br>×x | 0.021,<br>70                                                                                    | 0.021,<br>66 | 0.019,<br>68 | 0.80,<br>0.79                                                                                                    | 0.80-<br>0.79 | 0.72,<br>0.71 | 59, 62                                                                    |
| Winnipeg (1982-2018)    | y=0.97×<br>x                                                     | y=1.01<br>×x | 0.019,<br>84                                                                                    | 0.020,<br>84 | 0.020,<br>88 | 0.91,<br>0.91                                                                                                    | 0.90,<br>0.90 | 0.84,<br>0.85 | 55, 55##                                                                  |
| Edmonton (1981-2019)    | y=0.98×<br>x                                                     | y=1.02<br>×x | 0.048,<br>86                                                                                    | 0.046,<br>86 | 0.048,<br>86 | 0.74,<br>0.82                                                                                                    | 0.73,<br>0.82 | 0.76,<br>0.83 | 45, 62##                                                                  |
| Calgary (1981-2013)     | y=1.01×<br>x                                                     | y=1.07<br>×x | 0.064,<br>90                                                                                    | 0.067,<br>90 | 0.063,<br>91 | 0.76,<br>0.88                                                                                                    | 0.75,<br>0.88 | 0.78,<br>0.89 | 42, 59##                                                                  |
| Vancouver (1981-2019)   | y=1.00×<br>x                                                     | y=1.03<br>×x | 0.026,<br>82                                                                                    | 0.027,<br>82 | 0.026,<br>83 | 0.96,<br>0.85                                                                                                    | 0.96,<br>0.87 | 0.96,<br>0.86 | 71, 53##                                                                  |
| Victoria (1999-2019)    | y=1.01×<br>x                                                     | y=1.05<br>×x | 0.011,<br>57                                                                                    | 0.012,<br>59 | 0.010,<br>58 | 0.91,<br>0.89                                                                                                    | 0.90,<br>0.89 | 0.84,<br>0.82 | 62, 56                                                                    |

Table S4. Regression of (BRTs and RF) deweathered against original annual average SO<sub>2</sub> mixing ratios, annual decreasing rate (ppb year<sup>-1</sup>) and overall decreasing percentage (%) of deweathered and original SO<sub>2</sub> mixing ratios (decreasing trends were always obtained with P<0.05), correlation (R<sup>2</sup>) of deweathered and original SO<sub>2</sub> mixing ratios against provincial total SO<sub>2</sub> emissions and transportation SO<sub>2</sub> emissions (P<0.05), and percentage decreases (%) of the provincial total SO<sub>2</sub> emissions and transportation SO<sub>2</sub> emissions (#P>0.05; ##since 1990; Bold font numbers represent cases with smaller decreasing percentages in SO<sub>2</sub> mixing ratios than in corresponding provincial emissions; and R<sup>2</sup>>0.8 was highlighted in purple).

| City                    | Regression of deweathered against original mixing ratio (P<0.01) |              | Annual decreasing rate (ppb year <sup>-1</sup> ) and overall decreasing percentage (%) (P<0.05) |                    |                    | Correlation (R <sup>2</sup> ) of mixing ratios against provincial total and transportation SO <sub>2</sub> emissions (P<0.05) |             |             | Percentage decreases (%) of provincial total and transportation emissions |
|-------------------------|------------------------------------------------------------------|--------------|-------------------------------------------------------------------------------------------------|--------------------|--------------------|-------------------------------------------------------------------------------------------------------------------------------|-------------|-------------|---------------------------------------------------------------------------|
|                         | BRTs                                                             | RF           | BRTs                                                                                            | RF                 | original           | BRTs                                                                                                                          | RF          | original    |                                                                           |
| Halifax (2000-2019)     | y=1.00×<br>x                                                     | y=1.08<br>×x | 0.63,<br>93                                                                                     | 0.61,<br>90        | 0.59,<br>93        | <b>0.89</b>                                                                                                                   | <b>0.92</b> | <b>0.80</b> | 72                                                                        |
| Montreal (1995-2010)    | y=1.14×<br>x                                                     | y=1.02<br>×x | 0.37,<br>86                                                                                     | 0.35,<br>86        | 0.34,<br>79        | <b>0.86</b>                                                                                                                   | <b>0.82</b> | <b>0.82</b> | 76                                                                        |
| Quebec City (1996-2019) | y=0.96×<br>x                                                     | y=1.05<br>×x | 0.10,<br>85                                                                                     | 0.11,<br>78        | 0.11,<br>79        | 0.68                                                                                                                          | 0.70        | 0.65        | 75                                                                        |
| Toronto (2003-2019)     | y=1.03×<br>x                                                     | y=1.13<br>×x | 0.16,<br>95                                                                                     | 0.17,<br>89        | 0.15,<br>90        | <b>0.84</b>                                                                                                                   | <b>0.89</b> | <b>0.85</b> | 79                                                                        |
| Hamilton (1996-2019)    | y=1.01×<br>x                                                     | y=0.99<br>×x | 0.09,<br><b>23</b>                                                                              | 0.08,<br><b>27</b> | 0.10,<br><b>28</b> | 0.57                                                                                                                          | 0.51        | 0.42        | <b>81</b>                                                                 |
| Winnipeg (1987-2018)    | y=1.04×<br>x                                                     | y=1.16<br>×x | 0.06,<br>96                                                                                     | 0.07,<br>97        | 0.06,<br>95        | <b>0.91</b>                                                                                                                   | <b>0.85</b> | <b>0.90</b> | 92##                                                                      |
| Edmonton (1987-2019)    | y=1.00×<br>x                                                     | y=1.05<br>×x | 0.07,<br>55                                                                                     | 0.07,<br>53        | 0.07,<br>52        | 0.80                                                                                                                          | <b>0.81</b> | 0.73        | 57##                                                                      |
| Calgary (1983-2010)     | y=1.00×<br>x                                                     | y=1.04<br>×x | 0.09,<br>62                                                                                     | 0.10,<br>62        | 0.09,<br>64        | <b>0.83</b>                                                                                                                   | <b>0.84</b> | 0.80        | 30##                                                                      |
| Vancouver (1982-2019)   | y=0.98×<br>x                                                     | y=1.02<br>×x | 0.11,<br>90                                                                                     | 0.11,<br>91        | 0.12,<br>95        | 0.41                                                                                                                          | 0.40        | /#          | 38##                                                                      |
| Victoria (1999-2019)    | y=1.00×<br>x                                                     | y=1.08<br>×x | 0.05,<br>80                                                                                     | 0.05,<br>73        | 0.04,<br>82        | /#                                                                                                                            | /#          | /#          | /#                                                                        |



Table S5. Regression of (BRTs and RF) deweathered against original annual average O<sub>3</sub> and O<sub>x</sub> missing ratios, and their increasing or decreasing rates (ppb year<sup>-1</sup>) and overall increases or decreases (ppb) in ten Canadian cities during the last decades (#P>0.05; &1996-2019 in Quebec and Hamilton, 1994-2019 in Edmonton, and 1986-2010 in Calgary).

| City                    | O <sub>3</sub> mixing ratio                                      |              |                                                                                          |             |          | O <sub>x</sub> mixing ratio                                      |              |                                                                                          |                              |                            |
|-------------------------|------------------------------------------------------------------|--------------|------------------------------------------------------------------------------------------|-------------|----------|------------------------------------------------------------------|--------------|------------------------------------------------------------------------------------------|------------------------------|----------------------------|
|                         | Regression of deweathered against original mixing ratio (P<0.01) |              | Annual decreasing rate (ppb year <sup>-1</sup> ) and overall decrease (ppb) (%) (P<0.05) |             |          | Regression of deweathered against original mixing ratio (P<0.01) |              | Annual decreasing rate (ppb year <sup>-1</sup> ) and overall decrease (ppb) (%) (P<0.05) |                              |                            |
|                         | BRTs                                                             | RF           | BRTs                                                                                     | RF          | Original | BRTs                                                             | RF           | BRTs                                                                                     | RF                           | Original                   |
| Halifax (2000-2017)     | y=0.98×<br>x                                                     | y=0.98<br>×x | /#                                                                                       | /#          | /#       | y=1.00×<br>x                                                     | y=1.03×<br>x | 0.51,<br>10                                                                              | 0.52,<br>10                  | 0.62, 10                   |
| Montreal (1997-2010)    | y=0.97×<br>x                                                     | y=0.98<br>×x | 0.13,<br>3                                                                               | 0.12,<br>3  | 0.16, 4  | y=1.00×<br>x                                                     | y=1.00×<br>x | 0.23, 4                                                                                  | 0.22, 4                      | 0.22, 4                    |
| Quebec City (1995-2019) | y=1.01×<br>x                                                     | y=1.01<br>×x | 0.33,<br>7                                                                               | 0.34,<br>7  | 0.27, 6  | y=1.00×<br>x                                                     | y=1.00×<br>x | 0.15 <sup>&amp;</sup> ,<br>1                                                             | 0.14 <sup>&amp;</sup> ,<br>1 | 0.13 <sup>&amp;</sup> , 1  |
| Toronto (2003-2019)     | y=0.96×<br>x                                                     | y=0.95<br>×x | 0.10,<br>2                                                                               | 0.14,<br>2  | 0.22, 3  | y=1.00×<br>x                                                     | y=1.00×<br>x | 0.62,<br>10                                                                              | 0.62,<br>10                  | 0.59, 10                   |
| Hamilton (1996-2019)    | y=1.00×<br>x                                                     | y=1.01<br>×x | 0.32,<br>8                                                                               | 0.31,<br>8  | 0.35, 8  | y=1.00×<br>x                                                     | y=1.00×<br>x | 0.21 <sup>&amp;</sup> ,<br>3                                                             | 0.19 <sup>&amp;</sup> ,<br>3 | 0.21 <sup>&amp;</sup> , 3  |
| Winnipeg (1985-2018)    | y=0.98×<br>x                                                     | y=0.98<br>×x | 0.24,<br>5                                                                               | 0.25,<br>5  | 0.25, 7  | y=1.00×<br>x                                                     | y=1.00×<br>x | 0.14, 6                                                                                  | 0.14, 6                      | 0.17, 6                    |
| Edmonton (1981-2019)    | y=1.00×<br>x                                                     | y=1.01<br>×x | 0.16,<br>10                                                                              | 0.17,<br>10 | 0.17, 10 | y=1.00×<br>x                                                     | y=1.01×<br>x | 0.28 <sup>&amp;</sup> ,<br>8                                                             | 0.30 <sup>&amp;</sup> ,<br>9 | 0.33 <sup>&amp;</sup> , 10 |
| Calgary (1986-2014)     | y=1.00×<br>x                                                     | y=1.01<br>×x | 0.26,<br>8                                                                               | 0.27,<br>8  | 0.24, 8  | y=1.00×<br>x                                                     | y=1.01×<br>x | 0.37 <sup>&amp;</sup> ,<br>6                                                             | 0.41 <sup>&amp;</sup> ,<br>6 | 0.42 <sup>&amp;</sup> , 6  |
| Vancouver (1986-2019)   | y=0.99×<br>x                                                     | y=1.02<br>×x | 0.11, 2                                                                                  | 0.10,<br>2  | 0.11, 2  | y=1.00×<br>x                                                     | y=1.01×<br>x | 0.30,<br>12                                                                              | 0.29,<br>11                  | 0.28, 10                   |
| Victoria (1999-2019)    | y=1.00×<br>x                                                     | y=0.99<br>×x | 0.20,<br>2                                                                               | 0.19,<br>2  | 0.16, 1  | y=0.99×<br>x                                                     | y=0.99×<br>x | /#                                                                                       | /#                           | /#                         |

Fig. S1. Time series of PM<sub>2.5</sub> concentrations during two large wildfire periods in Edmonton.

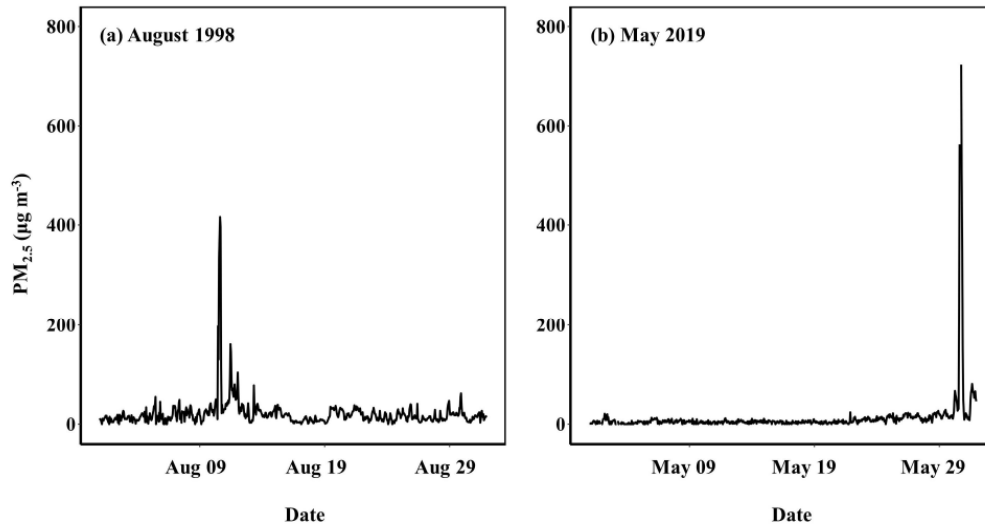

Fig. S2. BRTs-deweathered and RF-deweathered hourly mixing ratios of NO<sub>2</sub> in ten Canadian cities.

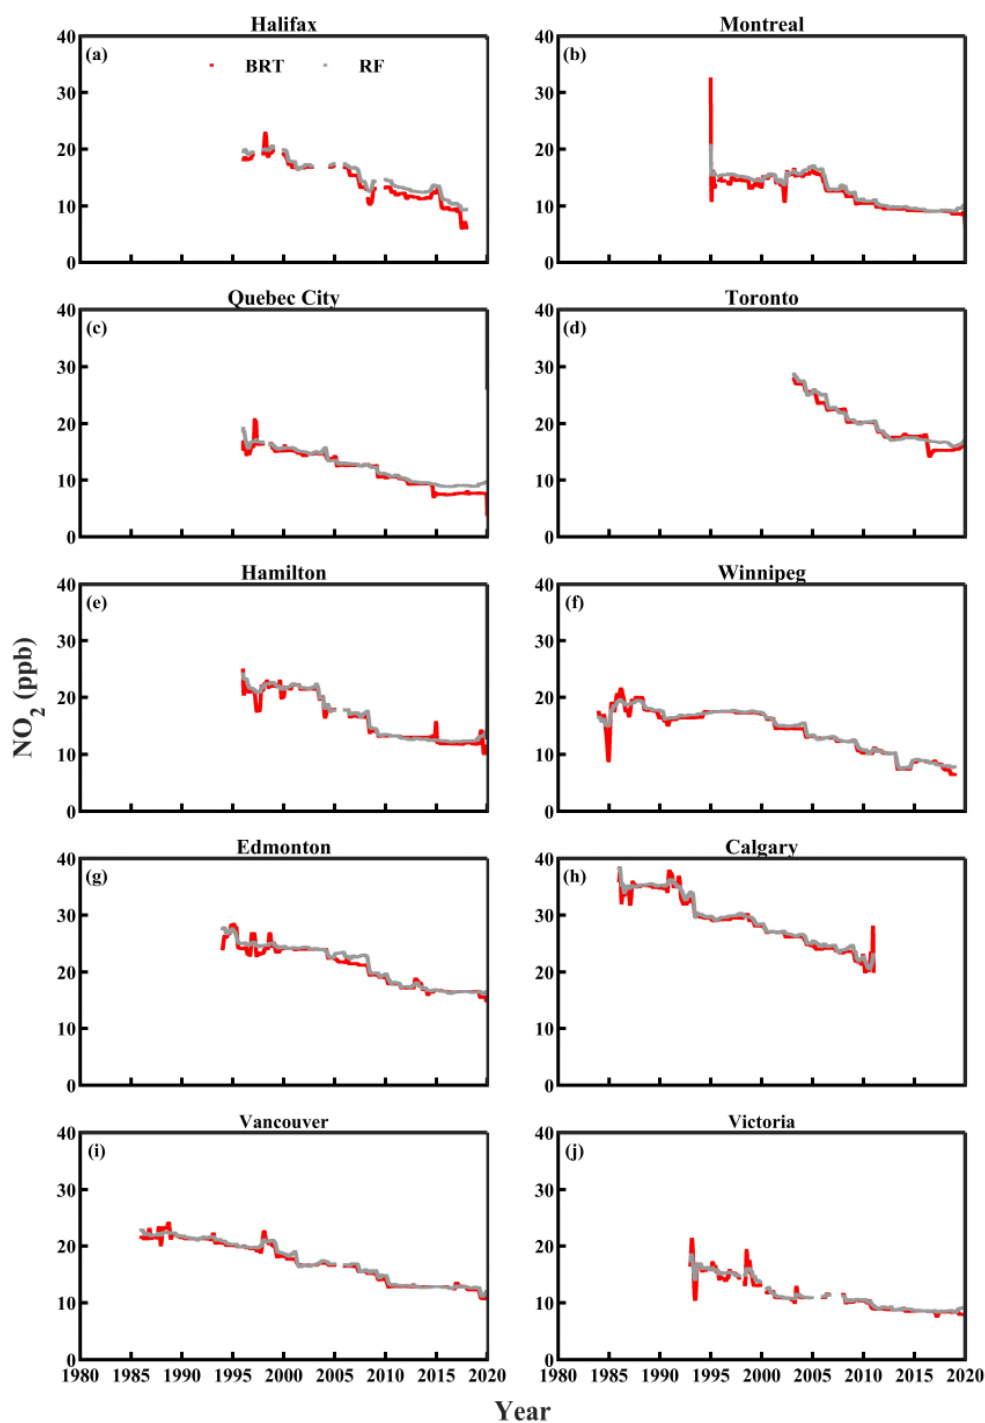

Note: The deweathered values are theoretically invariant in absence of mitigation of NO<sub>x</sub> in one year or consecutive several years. However, the deweathered values showed a step-wise decrease with the implemented emission control measures, which were generally observed in a—j. The spikes were probably associated with unpredictably increased emissions of NO<sub>x</sub>, e.g., in January of 1995 in Montreal, and the trough might be associated with unpredictably decreased emissions of NO<sub>x</sub>, e.g., in January of 1985 in Winnipeg. BRTs-deweathered values apparently better captured the unpredictably increased or decreased emissions, but this is not the case for the RF-deweathered values.

Fig. S3. Correlations of BRTs-deweathered and RF-deweathered annual averages of NO<sub>2</sub> and PM<sub>2.5</sub> with their respective original annual averages ((a) and (b)) and decreasing trends in annual average in Halifax (c).

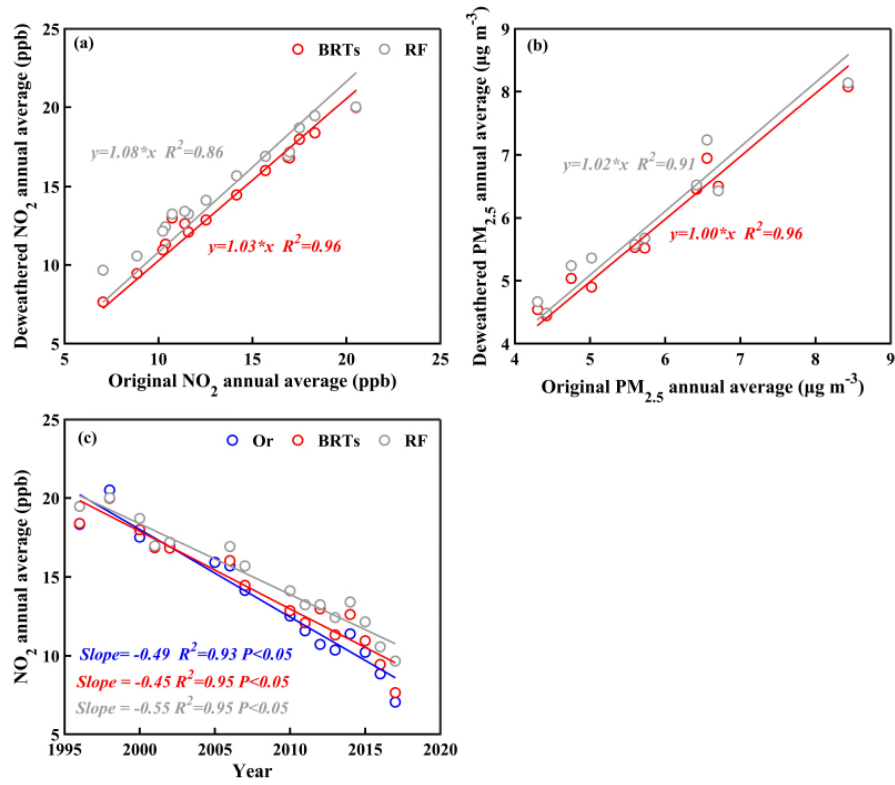

Fig. S4. Trends in original annual averages of CO and SO<sub>2</sub> in five eastern (top row) and five western (bottom row) Canadian cities.

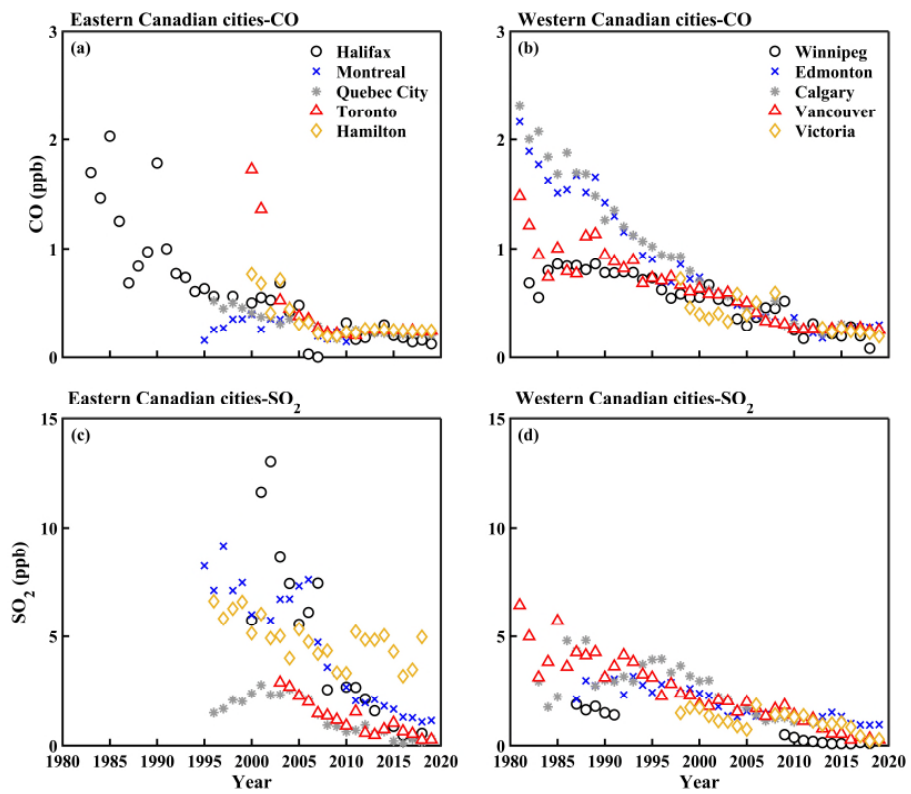

Fig. S5. Trends in original annual averages of  $O_3$  and  $O_x$  in five eastern (top row) and five western (bottom row) Canadian cities.

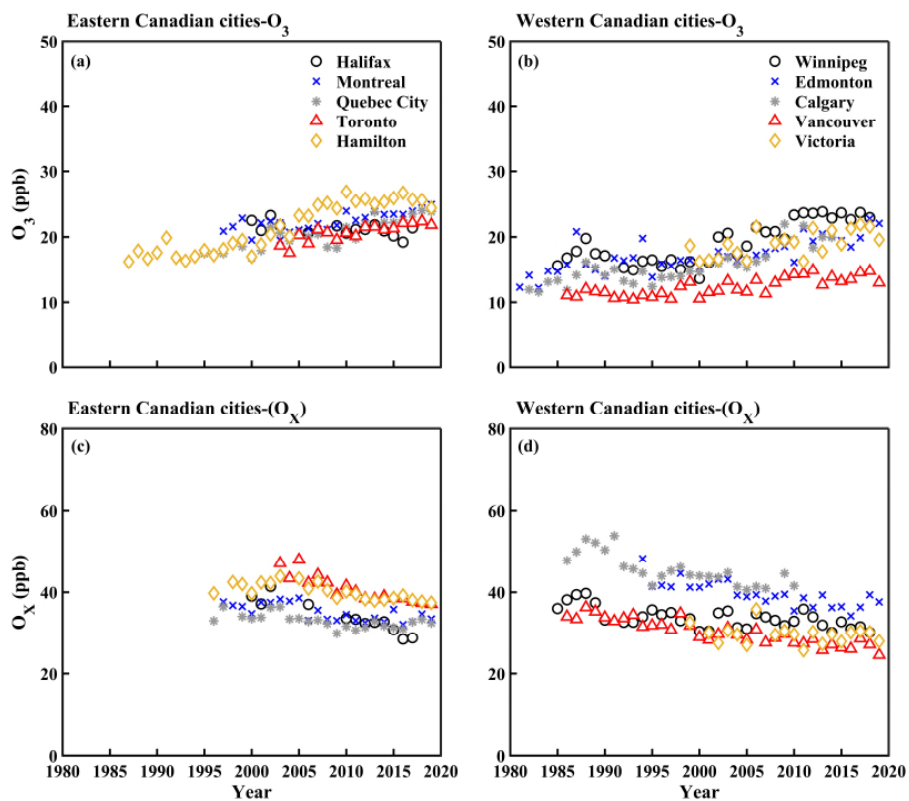

Fig. S6. BRTs- and RF-deweathered hourly mass concentrations of PM<sub>2.5</sub> in ten Canadian cities.

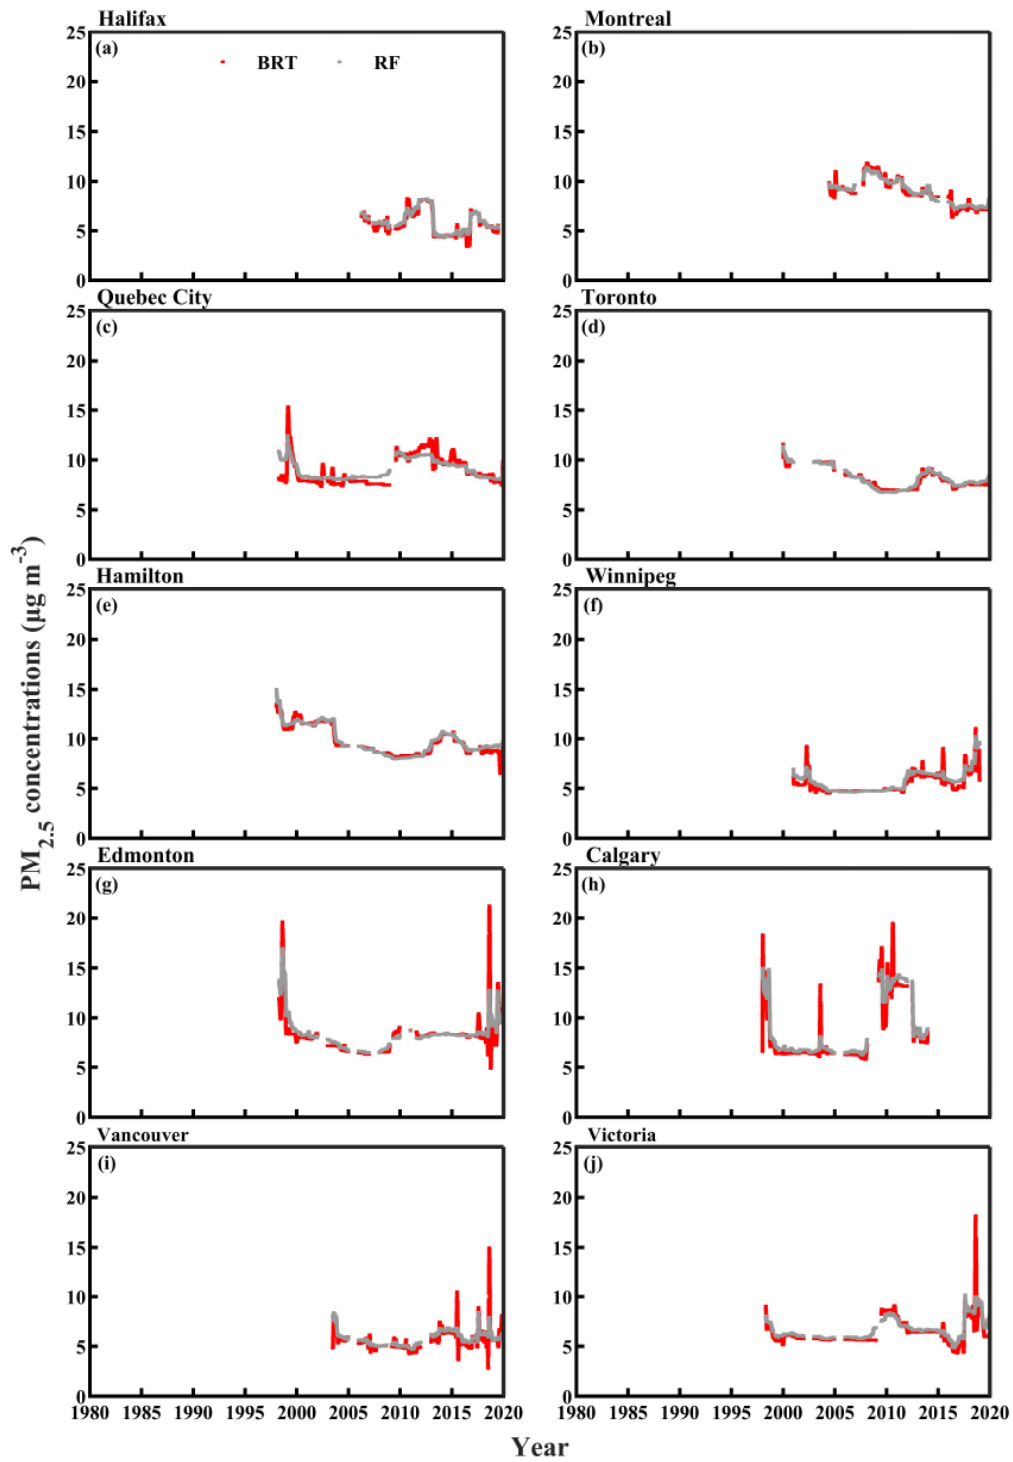

Fig. S7. Average and standard deviation of 95<sup>th</sup>-100<sup>th</sup> percentile concentrations of PM<sub>2.5</sub> in ten Canadian cities.

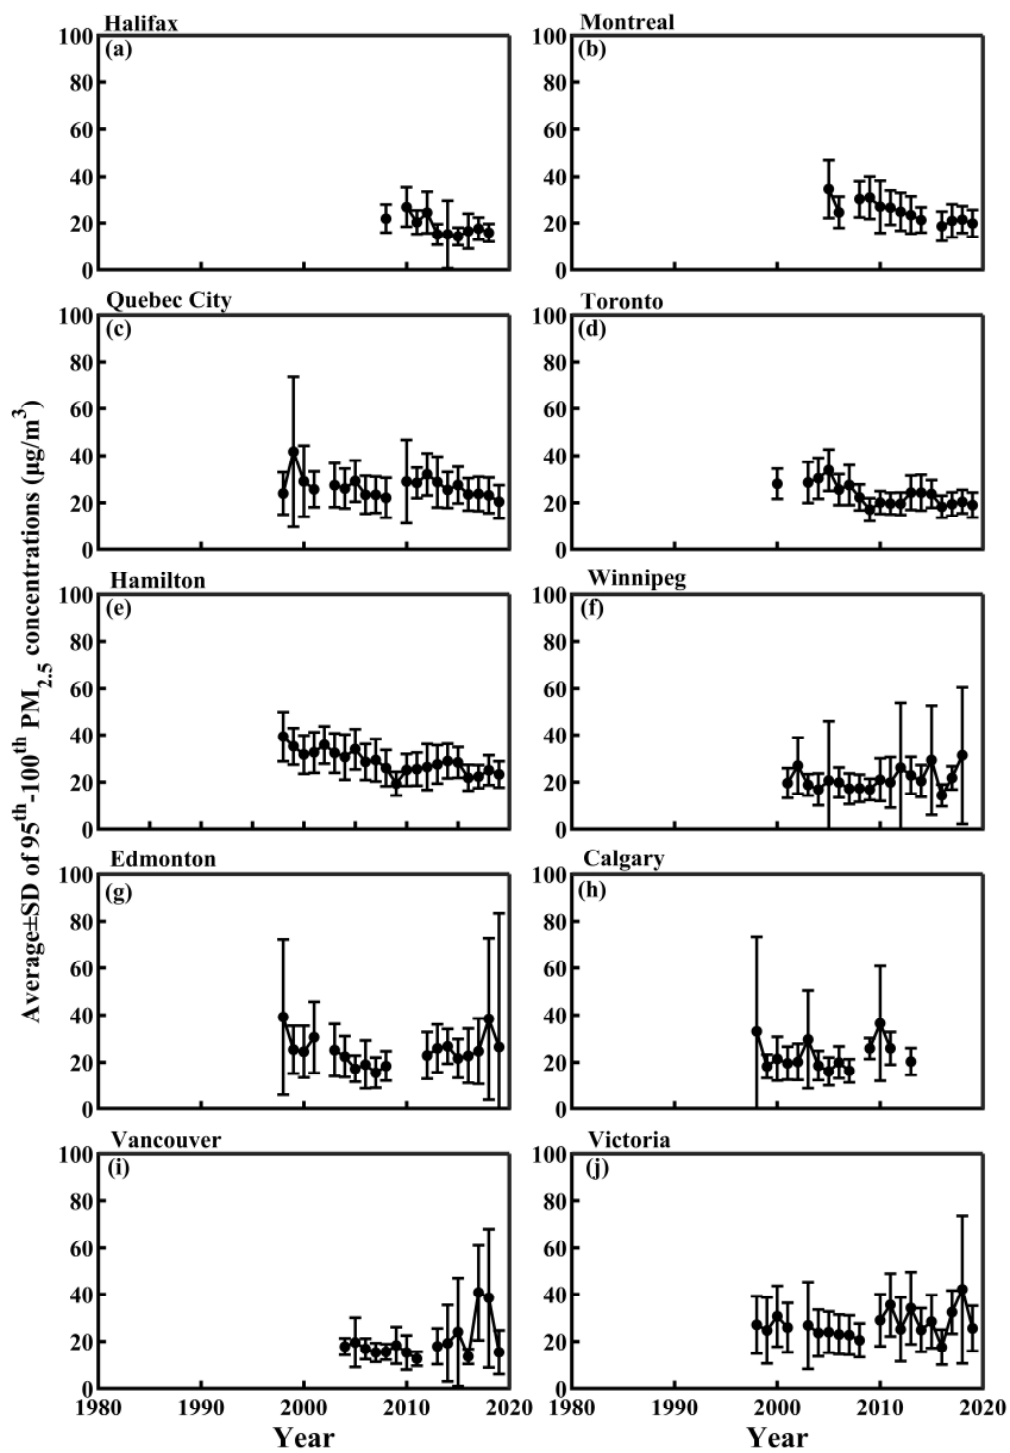



Fig. S8. BRTs- and RF-deweathered hourly mixing ratios of  $O_3$  (left column) and  $O_x$  (right column) at the level  $\geq 40$  ppb in five western Canadian cities.

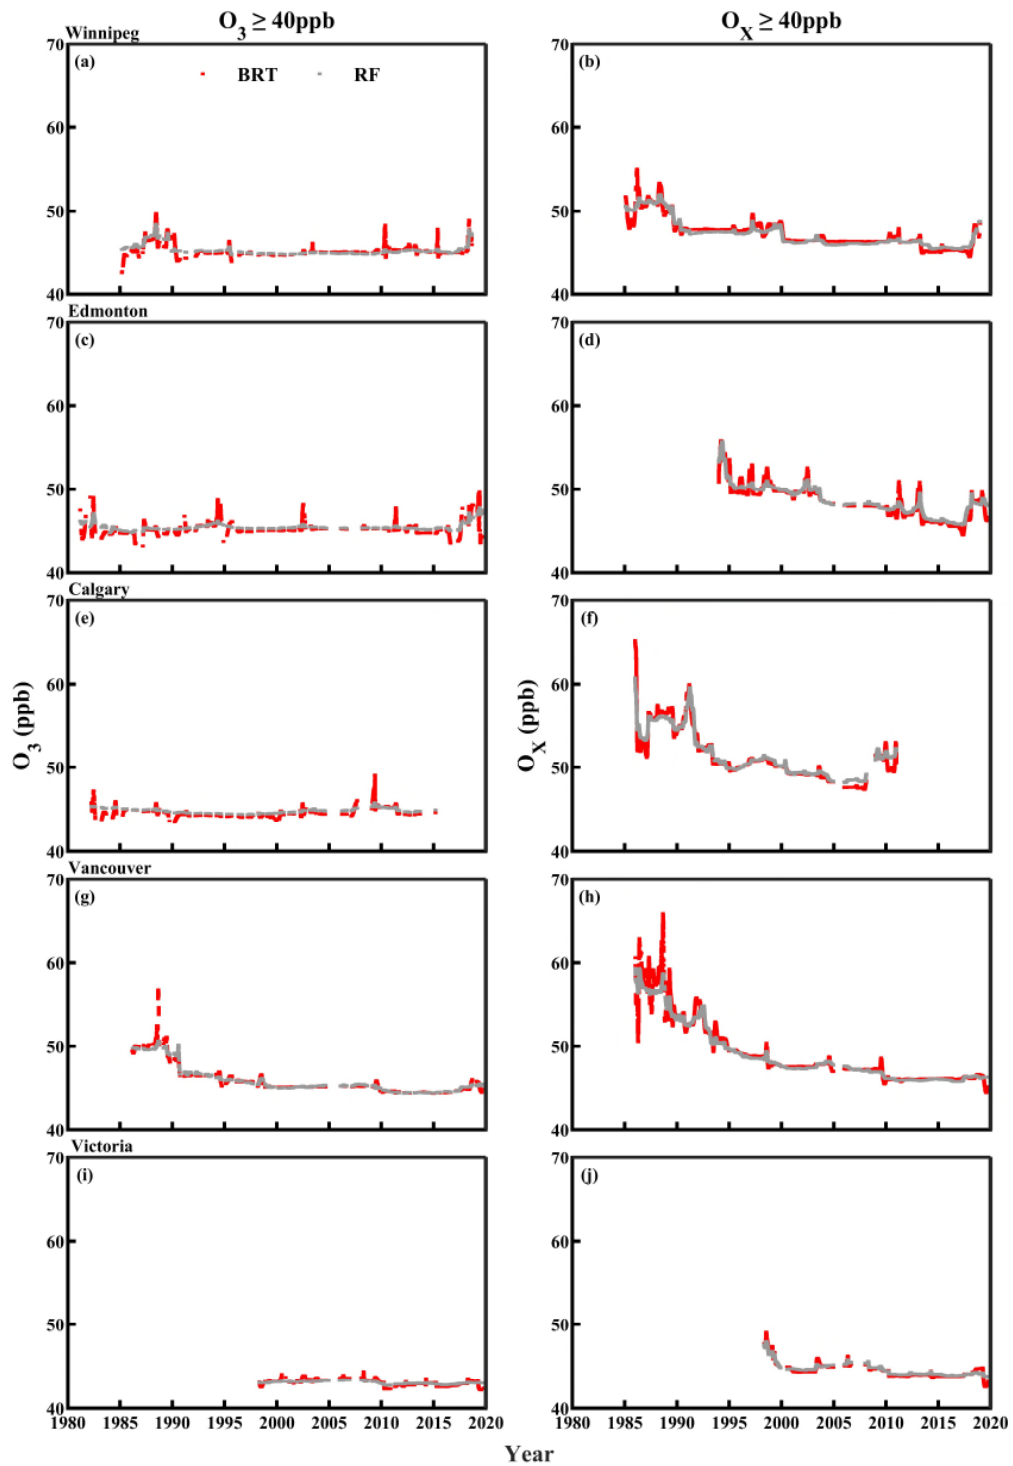

Fig. S9. The calculated AQHI in five eastern Canadian cities (left column shows original AQHI and right column shows annual average of AQHI and percentages of AQHI  $\geq 7$  and  $\geq 10$ ).

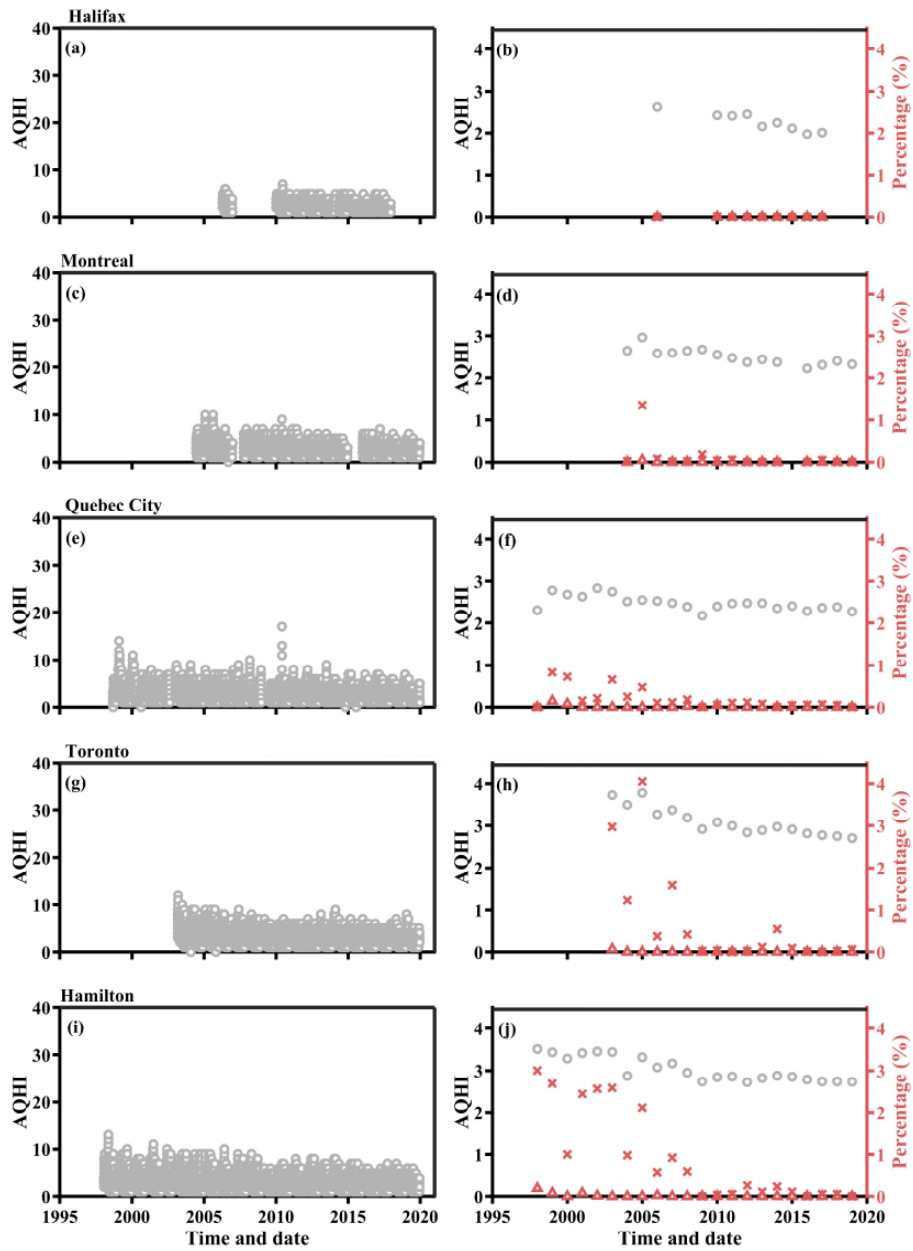

Fig. S10. The calculated AQHI in five western Canadian cities (left column shows original AQHI and right column shows annual average of AQHI and percentages of AQHI  $\geq 7$  and  $\geq 10$ ).

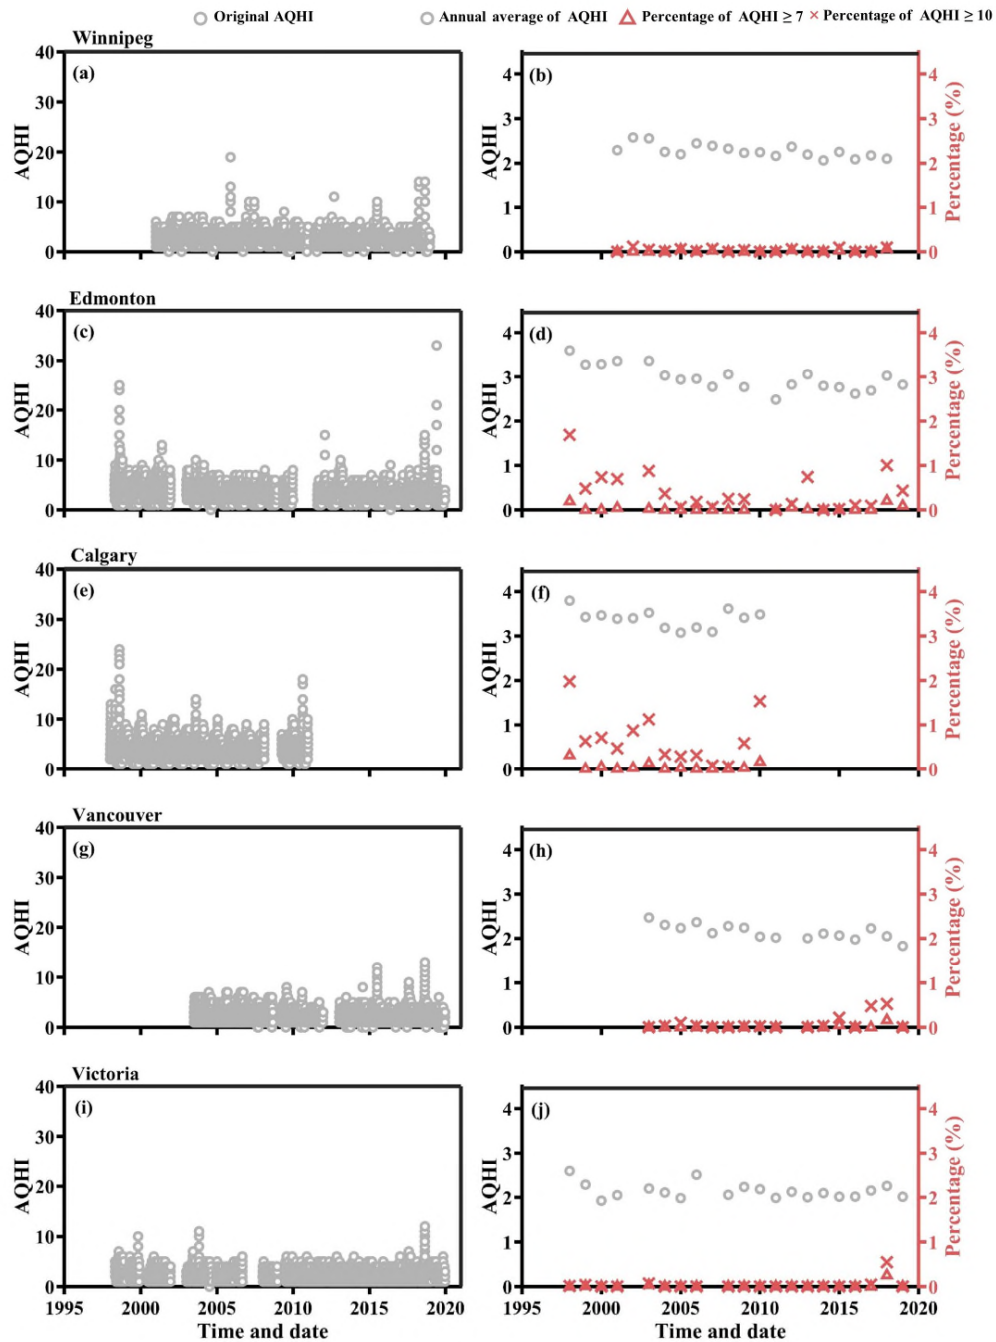

Supplement: Supplementary file 1 [file acp-24-7773-2024-supplement.pdf]
